# Supplementary material for: Whole‐Genome Promoter Profiling of Plasma DNA Exhibits Diagnostic Value for Placenta‐Origin Pregnancy Complications
Source: PubMed Central journal article supplement (PMC7141029; doi:10.1002/advs.201901819), 2020-02-18
Supplement: ADVS-7-1901819-s001.pdf [file ADVS-7-1901819-s001.pdf]

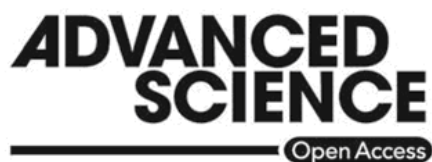

## Supporting Information

for *Adv. Sci.*, DOI: 10.1002/adv.201901819

### Whole-Genome Promoter Profiling of Plasma DNA Exhibits Diagnostic Value for Placenta-Origin Pregnancy Complications

*Zhiwei Guo, Fang Yang, Jun Zhang, Zhigang Zhang, Kun Li, Qi Tian, Hongying Hou, Cailing Xu, Qianwen Lu, Zhonglu Ren, Xiaoxue Yang, Zenglu Lv, Ke Wang, Xinpeng Yang,\* Yingsong Wu,\* and Xuexi Yang\**

## Supporting Information

**Whole-Genome Promoter Profiling of Plasma DNA Exhibits Diagnostic Value for Placenta-Origin Pregnancy Complications**

Zhiwei Guo<sup>1,†</sup>, Fang Yang<sup>2,†</sup>, Jun Zhang<sup>3,†</sup>, Zhigang Zhang<sup>4,†</sup>, Kun Li<sup>1</sup>, Qi Tian<sup>3</sup>, Hongying Hou<sup>3</sup>, Cailing Xu<sup>2</sup>, Qianwen Lu<sup>2</sup>, Zhonglu Ren<sup>2</sup>, Xiaoxue Yang<sup>2</sup>, Zenglu Lv<sup>4</sup>, Ke Wang<sup>2</sup>, Xinping Yang<sup>2,\*</sup>, Yingsong Wu<sup>1,\*</sup>, Xuexi Yang<sup>1,\*</sup>

**Supplemental methods****The definition of pregnancy complications and healthy controls**

All selected samples for developing classifiers were singleton pregnancies.

Macrosomia was defined as a birth weight  $> 4,000\text{-g}^{[1]}$  and gestational age at birth was  $\geq 37$  weeks.

Fetal growth restriction (FGR) was defined as a birth weight below the 10th percentile for gestational age<sup>[2]</sup> and gestational age at birth was  $\geq 37$  weeks.

Gestational diabetes mellitus (GDM) was defined according to International Association of Diabetes and Pregnancy Study Groups (IADPSG) criteria, with universal testing for GDM between 24 and 28 weeks' gestation with the 75-g 2-h OGTT. According to the IADPSG, at least one of the following criteria needs to be fulfilled for a GDM diagnosis: fasting plasma glucose,  $\geq 5.1$  mmol/L; 1-h glucose  $\geq 10.0$  mmol/L; 2-h glucose  $\geq 8.5$  mmol/L. In addition, pregnancies with diabetes mellitus type 1 or 2 were excluded.

Preeclampsia (PE) was defined according to the criteria of the International Society for the Study of Hypertension in Pregnancy (ISSHP), which required blood pressure  $\geq 90$  mmHg on at least two occasions, 4 h apart, with proteinuria  $\geq 0.3\text{-g}$  in a 24-h collection after 20 weeks' gestation in previously normotensive women.

Participants due to chromosomal, congenital abnormalities, preterm birth and multiple pregnancies were excluded.

Healthy control samples were full-term singleton pregnancies without pregnancy complications where the fetus was appropriately grown at birth with no obstetric, medical, or surgical complications in pregnancy.

**The number of control of case-control study**

This is a nested case-control study. According to other case-control study published in journals with high impact factor,<sup>[3-5]</sup> the ratio of control and case is usually 3-5:1.

Base on the number of gestation age-matched healthy controls in our cohort, we selected four gestation age-matched healthy controls for MA, FGR and PE. As the number of gestation age-matched healthy controls was limited by 267 GDM cases, we selected three controls for each GDM case. The gestational age of four pregnancy complications and their corresponding controls were well matched in four cohorts (Supplemental Table S1;  $p > 0.05$ , Mann-Whiney  $U$  test). According to the time of sample collection and the sample size, the samples collected from Nanfang Hospital were divided into two cohorts, including training cohort (70% of samples) and internal cohort (30% of samples). The samples involved in The Third Affiliated Hospital of Sun Yat-sen University (SYSU) and Cangzhou People's Hospital were taken as external cohort-1 and external cohort-2, respectively. As some control samples were used in more than one pregnancy complication prediction, the number of total control is less than the sum control number for each pregnancy complication.

### Isolation of cfDNA and whole-genome sequencing

Maternal blood was collected using a cfDNA BCT tube (Streck, USA). Cell-free plasma DNA (cfDNA) was extracted from a plasma sample using the QIAamp DNA Blood Mini kit (Qiagen, German) by following the manufacturer's instructions. DNA concentration and integration were measured using Qubit (ThermoFisher Scientific, USA) and Agilent Bioanalyzer 2100 (Agilent Technologies, USA). DNA was eluted in 50  $\mu$ L AE buffer and stored at  $-20^{\circ}\text{C}$ . For Life platform, libraries were prepared using the Ion Torrent Ampliseq 2.0 kit (ThermoFisher Scientific), according to the manufacturer's instructions. Samples were barcoded and quantified by qPCR using the Ion Xpress Barcode Adapter and the Ion Library TaqMan quantitation kit (ThermoFisher Scientific), respectively. Sequencing libraries were then sequenced on Ion Proton System on a P1 chip. For illumina platform, the DNA libraries were prepared using the TruSeq DNA Sample Prep reagents (Illumina, USA). After quantification on the LabChip GX microfluidic platform (Perkin- Elmer), the libraries were then sequenced using NextSeq. DNA sequencing was performed at a depth of  $0.3 \times$  average coverage.

### Reference:

- [1] J. M. Walsh, F. M. McAuliffe, *Eur J Obstet Gynecol Reprod Biol* **2012**, *162*, 125.
- [2] P. L. Yudkin, M. Aboualfa, J. A. Eyre, C. W. Redman, A. R. Wilkinson, *Early Hum Dev* **1987**, *15*, 45.
- [3] D. A. Grimes, K. F. Schulz, *Lancet* **2005**, *365*, 1429.
- [4] M. A. Hernan, A. J. Wilcox, *Epidemiology* **2009**, *20*, 167.

[5] Y. Lu, J. Lagergren, S. Eloranta, M. Lambe, *Epidemiology* **2009**, *20*, 780.

### A list of Supplemental Figures and Supplemental Tables

| ID                     | Description                                                                                     | File                      |
|------------------------|-------------------------------------------------------------------------------------------------|---------------------------|
| Supplemental Figure 1  | Promoter read depth patterns of highly and lowly expressed genes for pregnancy complications    | In this file              |
| Supplemental Figure 2  | Functional enrichment analysis of genes with differential promoter coverages                    | In this file              |
| Supplemental Table S1  | Clinical characteristics of study pregnancies in four cohorts                                   | In this file              |
| Supplemental Table S2  | Clinical characteristics of healthy pregnancies                                                 | In this file              |
| Supplemental Table S3  | 500 most highest- and lowest-expressed genes in tissues                                         | In a separated excel file |
| Supplemental Table S4  | Tissue-specific genes of placenta and whole blood cells                                         | In a separated excel file |
| Supplemental Table S5  | The unexpressed genes in all tissues                                                            | In a separated excel file |
| Supplemental Table S6  | Gene transcripts with differential read coverages at the pTSS                                   | In a separated excel file |
| Supplemental Table S7  | Functional annotation of genes with differential promoter coverage by retrieving literatures    | In this file              |
| Supplemental Table S8  | The performance of classifiers for predicting pregnancy complications                           | In this file              |
| Supplemental Table S9  | The performance of the optimal gene combination in the training cohort for macrosomia           | In this file              |
| Supplemental Table S10 | The performance of the optimal gene combination in the training cohort for FGR                  | In this file              |
| Supplemental Table S11 | The performance of the optimal gene combination in the training cohort for GDM                  | In this file              |
| Supplemental Table S12 | The performance of the optimal gene combination in the training cohort for PE                   | In this file              |
| Supplemental Table S13 | The logistical regression equations of classifiers                                              | In this file              |
| Supplemental Table S14 | The performance of the optimal classifiers based on promoter profiling of tissue-specific genes | In this file              |

|                        |                                                                             |              |
|------------------------|-----------------------------------------------------------------------------|--------------|
| Supplemental Table S15 | The AUC comparison between different classifier sets                        | In this file |
| Supplemental Table S16 | The performance of clinical features for predicting pregnancy complications | In this file |
| Supplemental Table S17 | Functional annotation of genes in classifiers by retrieving literatures     | In this file |
| Supplemental Table S18 | Performance evaluation of the classifiers                                   | In this file |

## Supplemental Figures and legends

### Supplemental Figures

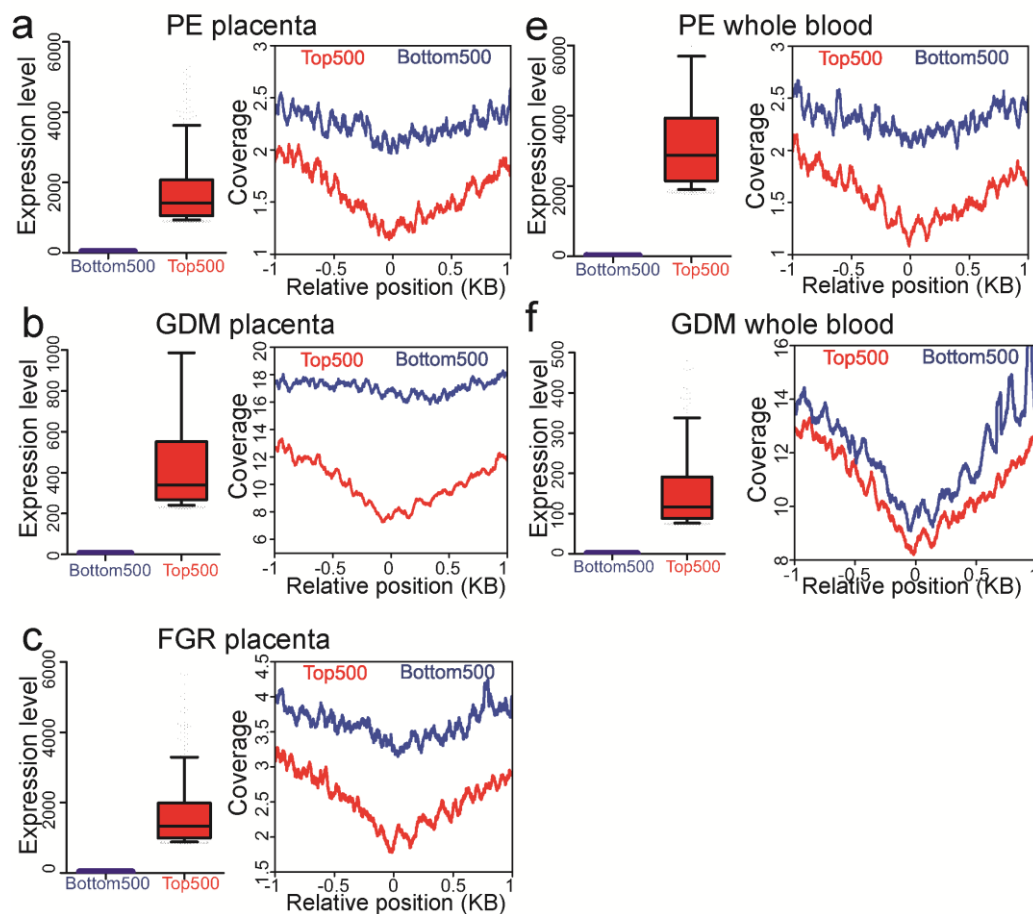

**Supplemental Figure 1. Promoter read depth patterns of highly and lowly expressed genes for pregnancy complications.** Mean expression levels of the 500 most- (Top500, red) and least-expressed (Bottom500, blue) genes in the placenta and their promoter read coverages of the cfDNA derived from pregnancies with PE (a), GDM (b) and FGR (c). Mean expression levels of the 500 most- and least-expressed genes in blood cells and their promoter read coverages of the cfDNA derived from pregnancies with PE (d) and GDM (e). FGR = fetal growth restriction. GDM = gestational diabetes mellitus. PE = preeclampsia

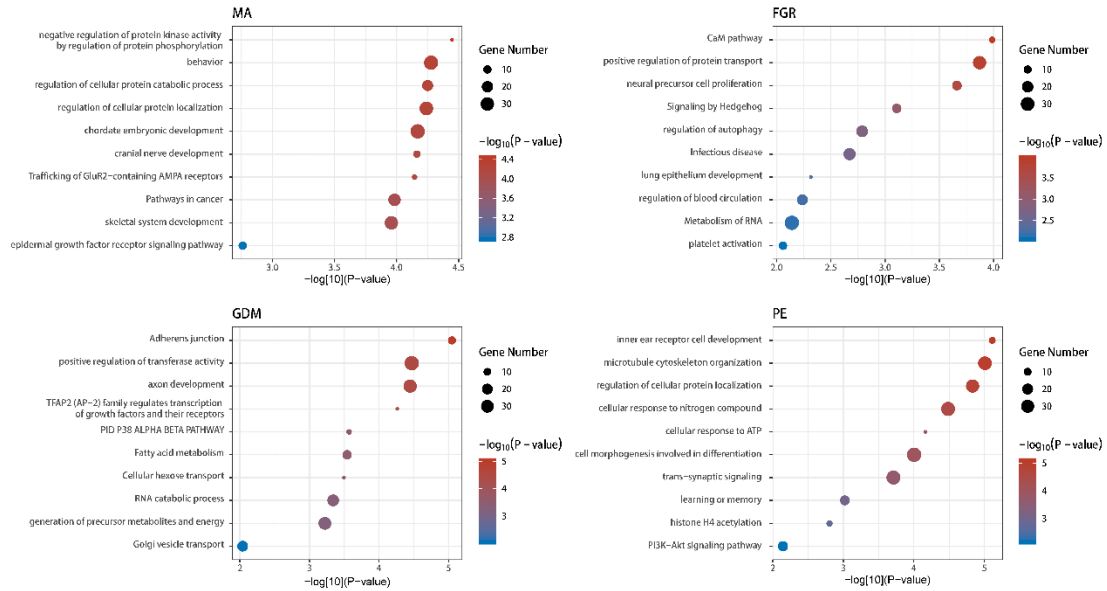

**Supplemental Figure 2. Functional enrichment analysis of genes with differential promoter coverages. (a) MA. (b) FGR. (c) GDM. (d) PE. MA = macrosomia. FGR = fetal growth restriction. GDM = gestational diabetes mellitus. PE = preeclampsia**

**Supplementary Tables**

**Supplemental Table S1. Clinical characteristics of study pregnancies in four cohorts**

|     |                | Gestational age at sampling |          |            |            | Maternal age |          |            |            |
|-----|----------------|-----------------------------|----------|------------|------------|--------------|----------|------------|------------|
|     |                | Training                    | Internal | External 1 | External 2 | Training     | Internal | External 1 | External 2 |
| MA  | Case           | 16.6±3.5                    | 15.9±3   | 16.4±3.4   | 18.6±3.8   | 33.3±3.6     | 35.7±2.1 | 34.0±3.4   | 30.6±5.0   |
|     | Contro 1       | 16.4±3.4                    | 15.9±3.3 | 16.4±3.3   | 18.8±3.9   | 31.7±5.0     | 32.1±5.1 | 34.0±3.3   | 30.1±4.9   |
|     | <i>p-value</i> | 0.774                       | 0.961    | 0.95       | 0.821      | 0.176        | 0.027    | 0.953      | 0.537      |
| FGR | Case           | 19.3±5                      | 18.8±6   | 19.4±6.2   | 18.3±3.9   | 30.9±5       | 31.5±3   | 31.3±5.2   | 31.0±6.1   |

|     |                |          |          |          |          |          |          |          |          |
|-----|----------------|----------|----------|----------|----------|----------|----------|----------|----------|
|     |                | 8        | 0        |          |          | 5        | 1        |          |          |
|     | Control        | 18.2±4.8 | 18.4±5.1 | 19.2±5.7 | 18.3±3.9 | 31.8±4.9 | 31.9±4.6 | 31.4±5.2 | 30.5±5.3 |
|     | <i>p-value</i> | 0.297    | 0.909    | 1.000    | 0.929    | 0.386    | 0.629    | 0.970    | 0.705    |
|     |                |          |          |          |          |          |          |          |          |
| GDM | Case           | 15.2±1.8 | 15.2±1.9 | 16.7±1.3 | 16.3±1.6 | 34.5±4.0 | 34.5±3.5 | 32.5±5.3 | 33.6±5.4 |
|     | Control        | 15.3±2.0 | 15.2±2.0 | 16.7±1.3 | 16.3±1.3 | 32.9±5.1 | 32.7±4.4 | 32.1±5.1 | 33.3±3.8 |
|     | <i>p-value</i> | 0.519    | 0.990    | 0.858    | 0.972    | 0.006    | 0.019    | 0.813    | 0.899    |
|     |                |          |          |          |          |          |          |          |          |
| PE  | Case           | 16.8±2.2 | 16.4±2.3 | 16.9±1.6 | /        | 33.8±5.5 | 36.4±2.9 | 33.3±4.8 | /        |
|     | Control        | 16.2±2.3 | 16.3±2.2 | 17.1±1.6 | /        | 32.9±0.4 | 35.3±0.2 | 32.8±0.7 | /        |
|     | <i>p-value</i> | 0.903    | 0.925    | 0.659    | /        | 0.357    | 0.188    | 0.664    | /        |

Data are mean ± standard deviation. *p* = Mann-Whitney *U* test. MA = macrosomia. FGR = fetal growth restriction. GDM = gestational diabetes mellitus. PE = preeclampsia

**Supplemental Table S2. Clinical characteristics of healthy pregnancies**

|                                     | Range | Number (n=300) |
|-------------------------------------|-------|----------------|
| Maternal age (years)                | ≤20   | 3              |
|                                     | 21-25 | 29             |
|                                     | 26-30 | 56             |
|                                     | 31-35 | 139            |
|                                     | ≥36   | 73             |
|                                     |       |                |
| Gestational age at sampling (weeks) | ≤12   | 23             |
|                                     | 13-28 | 277            |

**Supplemental Table S7. Functional annotation of genes with differential promoter coverage**

by retrieving literatures

|     | Function                                           | PMID                 |
|-----|----------------------------------------------------|----------------------|
| MA  | Epidermal growth factor receptor signaling pathway | 20817666<br>15592299 |
|     | Behavior                                           | 25256661             |
|     | Regulation of cellular protein localization        | 12646062             |
| FGR | Infectious disease                                 | 12933859<br>18482615 |
|     | Metabolism of RNA                                  | 2581828              |
|     | Lung epithelium development                        | 11536449             |
|     | Positive regulation of protein transport           | 19144403             |
|     | Regulation of blood circulation                    | 11169323<br>11864679 |
|     | Regulation of autophagy                            | 22815878             |
|     | Neural precursor cell proliferation                | 25720426             |
|     | Platelet activation                                | 8193094              |
| GDM | PID P38 ALPHA BETA PATHWAY                         | 12937895<br>26508738 |
|     | Fatty acid metabolism                              | 18849305<br>18986856 |
| PE  | Inner ear receptor cell development                | 20657326             |
|     | Microtubule cytoskeleton organization              | 15042020             |
|     | PI3K-Akt signaling pathway                         | 20488538             |
|     | Regulation of cellular protein localization        | 12389018             |
|     | Histone H4 acetylation                             | 31343798             |
|     | Learning or memory                                 | 28322777             |
|     | Cell morphogenesis involved in differentiation     | 23276825             |

PMID=PubMed Unique Identifier



**Supplemental Table S8. The performance of classifiers for predicting pregnancy complications**

|                          | Performance         |              |                 |                 |
|--------------------------|---------------------|--------------|-----------------|-----------------|
|                          | AUC (95% CI)        | Accuracy (%) | Sensitivity (%) | Specificity (%) |
| <b>Training cohort</b>   |                     |              |                 |                 |
| C <sub>MA-A</sub>        | 0.766 (0.678-0.854) | 80.0         | 71.0            | 82.3            |
| C <sub>FGR-A</sub>       | 0.774 (0.700-0.847) | 79.5         | 73.8            | 81.0            |
| C <sub>GDM-A</sub>       | 0.720 (0.674-0.765) | 72.6         | 70.6            | 73.3            |
| C <sub>PE-A</sub>        | 0.813 (0.727-0.898) | 81.5         | 80.8            | 81.7            |
| <b>Internal cohort</b>   |                     |              |                 |                 |
| C <sub>MA-A</sub>        | 0.817 (0.689-0.945) | 84.6         | 76.9            | 86.5            |
| C <sub>FGR-A</sub>       | 0.813 (0.703-0.922) | 81.3         | 81.3            | 81.3            |
| C <sub>GDM-A</sub>       | 0.732 (0.663-0.800) | 72.7         | 74.1            | 72.2            |
| C <sub>PE-A</sub>        | 0.898 (0.797-0.999) | 89.1         | 90.9            | 88.6            |
| <b>External cohort-1</b> |                     |              |                 |                 |
| C <sub>MA-A</sub>        | 0.791 (0.721-0.861) | 80.5         | 76.7            | 81.4            |
| C <sub>FGR-A</sub>       | 0.763 (0.684-0.843) | 79.5         | 71.1            | 81.6            |
| C <sub>GDM-A</sub>       | 0.699 (0.604-0.794) | 71.0         | 67.7            | 72.0            |
| C <sub>PE-A</sub>        | 0.804 (0.710-0.899) | 81.7         | 78.3            | 82.6            |
| <b>External cohort-2</b> |                     |              |                 |                 |
| C <sub>MA-A</sub>        | 0.762 (0.675-0.848) | 78.8         | 71.9            | 80.5            |
| C <sub>FGR-A</sub>       | 0.765 (0.684-0.845) | 76.5         | 76.5            | 76.5            |
| C <sub>GDM-A</sub>       | 0.711 (0.642-0.780) | 71.0         | 71.4            | 70.8            |
| C <sub>PE-A</sub>        | /                   | /            | /               | /               |
| <b>All subjects</b>      |                     |              |                 |                 |
| C <sub>MA-A</sub>        | 0.779 (0.736-0.823) | 80.3         | 73.9            | 81.9            |
| C <sub>FGR-A</sub>       | 0.773 (0.732-0.814) | 78.9         | 74.6            | 80.0            |
| C <sub>GDM-A</sub>       | 0.718 (0.687-0.749) | 72.1         | 71.2            | 72.4            |
| C <sub>PE-A</sub>        | 0.825 (0.770-0.880) | 83.0         | 81.7            | 83.3            |

AUC = area under the receive operating characteristic curve. 95% CI = 95% confidence interval.

**Supplemental Table S9. The performance of the optimal gene combination in the training cohort for macrosomia**

|                                      | Gene                 | Cut-off <sup>†</sup> | Performances       |        |        |        |
|--------------------------------------|----------------------|----------------------|--------------------|--------|--------|--------|
|                                      |                      |                      | AUC (95% CI)       | Acc(%) | Sen(%) | Spe(%) |
| Individual gene in C <sub>MA-A</sub> | SMC3                 | 9.86                 | 0.613(0.523-0.703) | 53.6   | 74.2   | 48.4   |
|                                      | MASTL                | 7.41                 | 0.621(0.523-0.719) | 64.5   | 58.1   | 66.1   |
|                                      | CREM                 | 9.54                 | 0.653(0.560-0.747) | 63.9   | 67.7   | 62.9   |
|                                      | C1QTNF12             | 7.45                 | 0.633(0.538-0.729) | 74.2   | 45.2   | 81.5   |
|                                      | MLXIP                | 7.41                 | 0.577(0.480-0.673) | 67.1   | 41.9   | 73.4   |
|                                      | MAP3K9               | 6.91                 | 0.577(0.480-0.673) | 67.1   | 41.9   | 73.4   |
|                                      | IGSF6                | 15.93                | 0.597(0.498-0.695) | 64.5   | 51.6   | 67.7   |
|                                      | APC2                 | 7.88                 | 0.633(0.536-0.730) | 70.3   | 51.6   | 75.0   |
|                                      | GPM6A                | 20.75                | 0.577(0.478-0.676) | 59.4   | 54.8   | 60.5   |
|                                      | TMEM128              | 17.56                | 0.609(0.511-0.707) | 64.5   | 45.2   | 62.9   |
|                                      | NIPBL                | 7.48                 | 0.540(0.442-0.639) | 59.4   | 54.8   | 37.1   |
|                                      | TMEM184A             | 11.49                | 0.637(0.540-0.734) | 67.1   | 58.1   | 69.4   |
|                                      | 12-genes combination | /                    | 0.766(0.678-0.854) | 80.0   | 71.0   | 82.3   |
|                                      |                      |                      |                    |        |        |        |
| Individual gene in C <sub>MA-P</sub> | VAV3                 | 16.71                | 0.625(0.527-0.723) | 69.0   | 51.6   | 73.4   |
|                                      | COL4A1               | 17.20                | 0.633(0.536-0.73)  | 66.5   | 58.1   | 68.6   |
|                                      | LEPROT               | 9.84                 | 0.569(0.471-0.666) | 54.2   | 61.3   | 52.4   |
|                                      | PROCR                | 20.72                | 0.621(0.529-0.713) | 56.8   | 71.0   | 53.2   |
|                                      | CRIM1                | 7.10                 | 0.601(0.502-0.699) | 65.2   | 51.6   | 68.6   |
|                                      | C5orf15              | 13.32                | 0.577(0.478-0.675) | 57.4   | 58.1   | 57.3   |
|                                      | CRH                  | 21.78                | 0.613(0.521-0.705) | 55.5   | 71.0   | 51.6   |
|                                      | TMEM2                | 8.82                 | 0.641(0.551-0.731) | 58.1   | 74.2   | 54.0   |
|                                      | CTSL                 | 18.85                | 0.573(0.474-0.672) | 58.7   | 54.8   | 59.7   |
|                                      | 9-genes combination  | /                    | 0.746(0.657-0.835) | 76.8   | 71.0   | 78.2   |
|                                      |                      |                      |                    |        |        |        |
| Individual gene in C <sub>MA-W</sub> | HSPA6                | 13.34                | 0.573(0.474-0.672) | 60.7   | 51.6   | 62.9   |
|                                      | SYF2                 | 14.56                | 0.589(0.494-0.683) | 53.6   | 67.7   | 50.0   |
|                                      | CCPG1                | 12.88                | 0.561(0.461-0.660) | 56.8   | 54.8   | 57.3   |
|                                      | PLEKHO2              | 7.08                 | 0.561(0.461-0.660) | 56.8   | 54.8   | 57.3   |
|                                      | TLE3                 | 9.50                 | 0.613(0.517-0.709) | 59.4   | 64.5   | 58.1   |
|                                      | SUPT4H1              | 11.21                | 0.605(0.510-0.700) | 56.1   | 67.7   | 53.2   |
|                                      | BID                  | 13.19                | 0.609(0.514-0.703) | 56.8   | 67.7   | 54.0   |
|                                      | CAB39                | 13.24                | 0.657(0.565-0.749) | 62.6   | 71.0   | 60.5   |
|                                      | PF4V1                | 22.83                | 0.540(0.441-0.64)  | 53.6   | 54.8   | 53.2   |
|                                      | PBX2                 | 9.49                 | 0.552(0.453-0.652) | 55.5   | 54.8   | 55.7   |
|                                      | MGAM                 | 20.75                | 0.561(0.461-0.660) | 58.7   | 51.6   | 60.5   |
|                                      | SDCBP                | 13.43                | 0.548(0.450-0.647) | 52.9   | 58.1   | 51.6   |
|                                      | 12-genes combination | /                    | 0.718(0.628-0.808) | 72.3   | 71.0   | 72.6   |
|                                      |                      |                      |                    |        |        |        |

|                                       |                      |       |                    |      |      |      |
|---------------------------------------|----------------------|-------|--------------------|------|------|------|
| Individual gene in C <sub>MA-PW</sub> | IFIT1                | 19.19 | 0.625(0.531-0.719) | 59.4 | 67.7 | 57.3 |
|                                       | VAV3                 | 16.71 | 0.625(0.527-0.723) | 69.0 | 51.6 | 73.4 |
|                                       | HSPA6                | 13.34 | 0.573(0.474-0.672) | 60.7 | 51.6 | 62.9 |
|                                       | COL4A1               | 17.20 | 0.633(0.536-0.73)  | 66.5 | 58.1 | 68.6 |
|                                       | SUSD6                | 9.25  | 0.613(0.518-0.707) | 57.4 | 67.7 | 54.8 |
|                                       | TLE3                 | 9.50  | 0.613(0.517-0.709) | 59.4 | 64.5 | 58.1 |
|                                       | WFDC1                | 25.70 | 0.625(0.527-0.723) | 69.0 | 51.6 | 73.4 |
|                                       | ARRB2                | 6.66  | 0.637(0.540-0.734) | 67.1 | 58.1 | 69.4 |
|                                       | PROCR                | 20.72 | 0.621(0.529-0.713) | 56.8 | 71.0 | 53.2 |
|                                       | MMP11                | 17.18 | 0.629(0.531-0.727) | 67.7 | 54.8 | 71.0 |
|                                       | C5orf15              | 13.32 | 0.577(0.478-0.675) | 57.4 | 58.1 | 57.3 |
|                                       | TMEM2                | 8.82  | 0.641(0.551-0.731) | 58.1 | 74.2 | 54.0 |
|                                       | CTSL                 | 18.85 | 0.573(0.474-0.672) | 58.7 | 54.8 | 59.7 |
|                                       | 13-genes combination | /     | 0.726(0.633-0.818) | 77.4 | 64.5 | 80.7 |

†The optimal cut-off point of each gene was defined when the value of (sensitivity+specificity)/2 reached a maximum. AUC = area under the receive operating characteristic curve. 95% CI = 95% confidence interval. Acc = accuracy. Sen = sensitivity. Spe = specificity.

**Supplemental Table S10. The performance of the optimal gene combination in the training cohort for FGR**

|                                       | Gene    | Cutoff <sup>†</sup> | Performances       |         |         |         |
|---------------------------------------|---------|---------------------|--------------------|---------|---------|---------|
|                                       |         |                     | AUC (95 CI)        | Acc (%) | Sen (%) | Spe (%) |
| Individual gene in C <sub>FGR-A</sub> | CD63    | 9.31                | 0.649(0.572-0.726) | 59.5    | 73.8    | 56.0    |
|                                       | TCF7    | 12.08               | 0.604(0.524-0.684) | 55.2    | 69.1    | 51.8    |
|                                       | OR4P4   | 10.06               | 0.592(0.512-0.674) | 54.8    | 66.7    | 51.8    |
|                                       | VPS35   | 9.33                | 0.554(0.472-0.635) | 48.6    | 66.7    | 44.1    |
|                                       | DNPEP   | 11.49               | 0.607(0.528-0.686) | 54.3    | 71.4    | 50.0    |
|                                       | FAM214B | 9.86                | 0.577(0.495-0.660) | 53.8    | 64.3    | 51.2    |
|                                       | PTDSS2  | 7.20                | 0.598(0.514-0.682) | 65.7    | 50.0    | 69.6    |
|                                       | GPAT4   | 13.26               | 0.607(0.524-0.691) | 61.4    | 59.5    | 61.9    |
|                                       | LANCL2  | 16.26               | 0.577(0.493-0.662) | 59.5    | 54.8    | 60.7    |
|                                       | VAV1    | 10.99               | 0.705(0.637-0.774) | 62.9    | 83.3    | 57.7    |
|                                       | HPS5    | 10.53               | 0.622(0.539-0.705) | 63.8    | 59.5    | 64.9    |
|                                       | DPP6    | 9.31                | 0.610(0.535-0.686) | 51.9    | 76.2    | 45.8    |

|                                        |                      |                      |                     |                     |      |      |
|----------------------------------------|----------------------|----------------------|---------------------|---------------------|------|------|
|                                        | PNRC2                | 13.02                | 0.571(0.487-0.656)  | 55.7                | 59.5 | 54.8 |
|                                        | 13-gene combination  | /                    | 0.774(0.700-0.847)  | 79.5                | 73.8 | 81.0 |
|                                        |                      |                      |                     |                     |      |      |
| Individual gene in C <sub>FGFR-P</sub> | ADM                  | 12.57                | 0.628(0.549-0.707)  | 57.6                | 71.4 | 54.2 |
|                                        | HSD17B1              | 15.52                | 0.622(0.540-0.704)  | 61.0                | 64.3 | 60.1 |
|                                        | MMP11                | 12.60                | 0.619(0.538-0.700)  | 59.0                | 66.7 | 57.1 |
|                                        | FBLN1                | 15.11                | 0.569(0.486-0.651)  | 52.4                | 64.3 | 49.4 |
|                                        | SLC5A6               | 14.06                | 0.625(0.550-0.700)  | 54.3                | 76.2 | 48.8 |
|                                        | CRIM1                | 9.86                 | 0.589(0.509-0.670)  | 52.9                | 69   | 48.8 |
|                                        | ACVR2B               | 12.74                | 0.619(0.540-0.698)  | 56.2                | 71.4 | 52.4 |
|                                        | RYBP                 | 7.62                 | 0.542(0.460-0.624)  | 63.8                | 38.1 | 70.2 |
|                                        | PRKAG2               | 11.83                | 0.568(0.484-0.653)  | 55.2                | 59.5 | 54.2 |
|                                        | BZW2                 | 11.02                | 0.613(0.531-0.695)  | 59.5                | 64.3 | 58.3 |
|                                        | AZIN1                | 6.74                 | 0.521(0.438-0.603)  | 60.5                | 38.1 | 66.1 |
|                                        | LAMC3                | 17.83                | 0.679(0.605-0.752)  | 61.4                | 78.6 | 57.1 |
|                                        | 12-genes combination | /                    | 0.711 (0.633-0.790) | 72.4                | 69.0 | 73.2 |
|                                        |                      |                      |                     |                     |      |      |
| Individual gene in C <sub>FGFR-W</sub> | MAP3K11              | 9.19                 | 0.536(0.451-0.621)  | 52.9                | 54.8 | 52.4 |
|                                        | PLXNC1               | 9.31                 | 0.586(0.503-0.670)  | 56.7                | 61.9 | 55.4 |
|                                        | CAP1                 | 9.10                 | 0.548(0.463-0.633)  | 54.8                | 54.8 | 54.8 |
|                                        | NUMB                 | 9.33                 | 0.563(0.478-0.648)  | 58.6                | 52.4 | 60.1 |
|                                        | MLH3                 | 15.86                | 0.586(0.504-0.669)  | 55.2                | 64.3 | 53.0 |
|                                        | VMP1                 | 17.08                | 0.566(0.481-0.650)  | 60.5                | 50.0 | 63.1 |
|                                        | ARPC2                | 9.32                 | 0.631(0.550-0.712)  | 61.0                | 66.7 | 59.5 |
|                                        | PPP3R1               | 6.37                 | 0.607(0.530-0.684)  | 52.9                | 73.8 | 47.6 |
|                                        | ARAP3                | 12.26                | 0.563(0.478-0.647)  | 57.1                | 54.8 | 57.7 |
|                                        | LST1                 | 14.60                | 0.604(0.521-0.687)  | 59.5                | 61.9 | 58.9 |
|                                        |                      | 10-genes combination | /                   | 0.670(0.588-0.751)  | 70.0 | 61.9 |
|                                        |                      |                      |                     |                     |      |      |
|                                        | ADM                  | 12.57                | 0.628(0.549-0.707)  | 57.6                | 71.4 | 54.2 |
|                                        | CAP1                 | 9.10                 | 0.527(0.442-0.612)  | 51.4                | 54.8 | 50.6 |
|                                        | NUMB                 | 9.33                 | 0.586(0.504-0.669)  | 55.2                | 64.3 | 53.0 |
|                                        | MLH3                 | 15.86                | 0.628(0.548-0.708)  | 59.1                | 69.1 | 56.6 |
|                                        | SERPINB2             | 24.34                | 0.598(0.515-0.681)  | 58.6                | 61.9 | 57.7 |
|                                        | ACVR2B               | 12.74                | 0.619(0.540-0.698)  | 56.2                | 71.4 | 52.4 |
|                                        | PRKAG2               | 11.83                | 0.569(0.484-0.653)  | 55.2                | 59.5 | 54.2 |
|                                        | PILRA                | 18.10                | 0.563(0.478-0.647)  | 57.1                | 54.8 | 57.7 |
|                                        | FAM49B               | 13.48                | 0.604(0.521-0.687)  | 59.5                | 61.9 | 58.9 |
|                                        |                      | 10-genes combination | /                   | 0.688 (0.608-0.768) | 70.0 | 66.7 |

<sup>†</sup>The optimal cut-off point of each gene was defined when the value of (sensitivity+specificity)/2 reached a maximum. AUC = area under the receive operating characteristic curve. 95% CI = 95% confidence interval. Acc = accuracy. Sen = sensitivity. Spe = specificity.

**Supplemental Table S11. The performance of the optimal gene combination in the training cohort for GDM**

|                                       | Gene    | Cutoff <sup>†</sup> | Performances       |        |        |        |
|---------------------------------------|---------|---------------------|--------------------|--------|--------|--------|
|                                       |         |                     | AUC (95% CI)       | Acc(%) | Sen(%) | Spe(%) |
| Individual gene in C <sub>GDM-A</sub> | CC2D2B  | 18.38               | 0.579(0.529-0.629) | 61.1   | 51.6   | 64.3   |
|                                       | NAT10   | 16.96               | 0.616(0.570-0.663) | 56.8   | 71.4   | 51.9   |
|                                       | SIPA1   | 16.83               | 0.614(0.568-0.660) | 54.8   | 74.6   | 48.2   |
|                                       | ZNF565  | 13.92               | 0.583(0.537-0.630) | 51.0   | 73.0   | 43.7   |
|                                       | ZNF552  | 16.80               | 0.582(0.536-0.628) | 50.4   | 73.8   | 42.6   |
|                                       | WDR35   | 17.97               | 0.549(0.500-0.600) | 50.6   | 63.5   | 46.3   |
|                                       | MICALL1 | 10.68               | 0.583(0.533-0.633) | 60.5   | 54.0   | 62.7   |
|                                       | CTNNB1  | 13.73               | 0.573(0.525-0.620) | 51.4   | 69.1   | 45.5   |
|                                       | CLOCK   | 13.93               | 0.575(0.527-0.624) | 53.0   | 66.7   | 48.4   |
|                                       | BCKDHB  | 14.44               | 0.573(0.523-0.623) | 56.2   | 59.5   | 55.0   |
|                                       | TGIF2LY | 7.26                | 0.593(0.544-0.642) | 56.8   | 64.3   | 54.2   |
| 11-genes combination                  | /       | 0.720(0.674-0.765)  | 72.6               | 70.6   | 73.3   |        |
|                                       |         |                     |                    |        |        |        |
| Individual gene in C <sub>GDM-P</sub> | RBMS2   | 14.89               | 0.561(0.513-0.609) | 50.0   | 31.8   | 56.1   |
|                                       | IFI6    | 20.20               | 0.564(0.513-0.614) | 57.1   | 54.8   | 57.9   |
|                                       | HSD17B2 | 22.41               | 0.579(0.529-0.629) | 59.1   | 55.6   | 60.3   |
|                                       | DLX4    | 17.42               | 0.565(0.515-0.615) | 55.4   | 58.7   | 54.2   |
|                                       | CSHL1   | 20.22               | 0.550(0.500-0.600) | 53.2   | 58.7   | 51.3   |
|                                       | LGALS14 | 23.77               | 0.564(0.514-0.613) | 54.0   | 61.1   | 51.6   |
|                                       | EPS8L1  | 15.41               | 0.554(0.504-0.604) | 53.8   | 58.7   | 52.1   |
|                                       | PROCR   | 20.10               | 0.546(0.496-0.597) | 56.9   | 50.0   | 59.3   |
|                                       | DAG1    | 9.64                | 0.554(0.504-0.604) | 54.6   | 57.1   | 53.7   |
|                                       | SQSTM1  | 7.70                | 0.534(0.484-0.585) | 55.2   | 50.0   | 56.9   |
|                                       | AZIN1   | 7.91                | 0.515(0.464-0.565) | 52.2   | 50.0   | 52.9   |
|                                       | CTSL    | 16.61               | 0.586(0.538-0.634) | 54.6   | 67.0   | 50.5   |
| 12-genes combination                  | /       | 0.652(0.604-0.700)  | 66.5               | 62.7   | 67.7   |        |
|                                       |         |                     |                    |        |        |        |

|                                        |                      |       |                    |      |      |      |
|----------------------------------------|----------------------|-------|--------------------|------|------|------|
| Individual gene in C <sub>GDM-W</sub>  | CREBBP               | 7.26  | 0.519(0.468-0.569) | 52.0 | 51.6 | 52.1 |
|                                        | SUPT4H1              | 10.57 | 0.566(0.518-0.615) | 51.6 | 66.7 | 46.6 |
|                                        | CTBS                 | 15.23 | 0.593(0.543-0.642) | 57.5 | 62.7 | 55.8 |
|                                        | ARPC2                | 8.37  | 0.534(0.484-0.585) | 55.2 | 50.0 | 56.9 |
|                                        | ASXL2                | 10.98 | 0.523(0.472-0.573) | 51.0 | 54.8 | 49.7 |
|                                        | PF4                  | 18.60 | 0.545(0.495-0.595) | 56.8 | 50.0 | 59.0 |
|                                        | HIST1H2BC            | 10.98 | 0.570(0.520-0.620) | 55.8 | 59.5 | 54.5 |
|                                        | SDCBP                | 10.69 | 0.558 (0.51-0.606) | 50.0 | 67.5 | 44.2 |
|                                        | TOPORS               | 14.83 | 0.562(0.513-0.611) | 52.6 | 63.5 | 48.9 |
|                                        | 9-genes combination  | /     | 0.626(0.576-0.675) | 64.5 | 58.7 | 66.4 |
|                                        |                      |       |                    |      |      |      |
| Individual gene in C <sub>GDM-PW</sub> | FRAT1                | 6.94  | 0.554(0.504-0.605) | 57.3 | 51.6 | 59.3 |
|                                        | IFI6                 | 20.20 | 0.564(0.513-0.614) | 57.1 | 54.8 | 57.9 |
|                                        | HSD11B2              | 11.15 | 0.523(0.472-0.573) | 52.6 | 51.6 | 52.9 |
|                                        | HSD17B2              | 22.41 | 0.579(0.529-0.629) | 59.1 | 55.6 | 60.3 |
|                                        | DLX4                 | 17.42 | 0.565(0.515-0.615) | 55.4 | 58.7 | 54.2 |
|                                        | CSHL1                | 20.22 | 0.550(0.500-0.600) | 53.2 | 58.7 | 51.3 |
|                                        | LGALS14              | 23.77 | 0.564(0.514-0.613) | 53.9 | 61.1 | 51.6 |
|                                        | ARPC2                | 8.37  | 0.534(0.484-0.585) | 55.2 | 50.0 | 56.9 |
|                                        | HIST1H2BC            | 10.98 | 0.570(0.520-0.620) | 55.8 | 59.5 | 54.5 |
|                                        | TMEM2                | 10.27 | 0.550(0.500-0.600) | 54.8 | 55.6 | 54.5 |
|                                        | VGLL1                | 23.50 | 0.537(0.487-0.588) | 53.6 | 54.0 | 53.4 |
|                                        | 11-genes combination | /     | 0.647(0.598-0.696) | 67.3 | 59.5 | 69.8 |

†The optimal cut-off point of each gene was defined when the value of (sensitivity+specificity)/2 reached a maximum. AUC = area under the receive operating characteristic curve. 95% CI = 95% confidence interval. Acc = accuracy. Sen = sensitivity. Spe = specificity.

**Supplementary Table S12. The performance of the optimal gene combination in the training cohort for PE**

|                                      | Gene                 | Cutoff <sup>†</sup> | Performances        |        |        |        |
|--------------------------------------|----------------------|---------------------|---------------------|--------|--------|--------|
|                                      |                      |                     | AUC (95% CI)        | Acc(%) | Sen(%) | Spe(%) |
| Individual gene in C <sub>PE-A</sub> | NFKB2                | 8.37                | 0.625(0.520-0.730)  | 60.8   | 65.4   | 59.6   |
|                                      | EHBPI1               | 9.36                | 0.639(0.540-0.739)  | 58.5   | 73.1   | 54.8   |
|                                      | AMOTL1               | 13.10               | 0.606(0.498-0.713)  | 62.3   | 57.7   | 63.5   |
|                                      | VSIG10               | 12.19               | 0.615(0.509-0.722)  | 61.5   | 61.5   | 61.5   |
|                                      | USP10                | 9.75                | 0.577(0.469-0.685)  | 60.0   | 53.9   | 61.5   |
|                                      | ZSWIM4               | 6.26                | 0.582(0.476-0.687)  | 67.7   | 42.3   | 74.0   |
|                                      | ZNF565               | 13.17               | 0.625(0.519-0.731)  | 63.1   | 61.5   | 63.5   |
|                                      | BZW1                 | 8.31                | 0.625(0.520-0.730)  | 60.8   | 65.4   | 59.6   |
|                                      | ATP6V1E2             | 10.58               | 0.606(0.499-0.712)  | 60.0   | 61.5   | 59.6   |
|                                      | CDX1                 | 22.03               | 0.649(0.544-0.755)  | 66.9   | 61.5   | 68.3   |
|                                      | 10-genes combination | /                   | 0.813(0.727-0.898)  | 81.5   | 80.8   | 81.7   |
| Individual gene in C <sub>PE-P</sub> | ITIH5                | 12.39               | 0.6394(0.54-0.739)  | 58.5   | 73.1   | 54.8   |
|                                      | ST3GAL4              | 13.38               | 0.606(0.498-0.713)  | 62.3   | 57.7   | 63.5   |
|                                      | EVA1B                | 16.40               | 0.615(0.509-0.722)  | 61.5   | 61.5   | 61.5   |
|                                      | PSG1                 | 11.12               | 0.582(0.476-0.687)  | 67.7   | 42.3   | 74     |
|                                      | PSG7                 | 24.95               | 0.635(0.529-0.741)  | 64.6   | 61.5   | 65.4   |
|                                      | SDC1                 | 11.15               | 0.625(0.519-0.731)  | 63.1   | 61.5   | 63.5   |
|                                      | AGTR1                | 29.67               | 0.707(0.616-0.797)  | 64.6   | 80.8   | 60.6   |
|                                      | RYBP                 | 8.32                | 0.615(0.511-0.72)   | 59.2   | 65.4   | 57.7   |
|                                      | AFF1                 | 14.89               | 0.625(0.520-0.73)   | 60.8   | 65.4   | 59.6   |
|                                      | TNS3                 | 15.16               | 0.606(0.499-0.712)  | 60.0   | 61.5   | 59.6   |
|                                      | GNE                  | 12.46               | 0.659(0.573-0.7442) | 54.6   | 84.6   | 47.1   |
|                                      | HMGB3                | 11.59               | 0.649(0.544-0.755)  | 66.9   | 61.5   | 68.3   |
|                                      | 12-genes combination | /                   | 0.736(0.639-0.832)  | 73.85  | 73.08  | 74.04  |
| Individual gene in C <sub>PE-W</sub> | PXN                  | 14.45               | 0.611(0.503-0.718)  | 67.7   | 50.0   | 72.1   |
|                                      | CAP1                 | 8.14                | 0.596(0.490-0.703)  | 58.5   | 61.5   | 57.7   |
|                                      | MLH3                 | 13.57               | 0.51(0.400-0.619)   | 51.5   | 50.0   | 51.9   |
|                                      | CCPG1                | 16.09               | 0.558(0.449-0.666)  | 56.9   | 53.8   | 57.7   |
|                                      | CRLF3                | 10.80               | 0.611(0.504-0.717)  | 60.8   | 61.5   | 60.6   |
|                                      | VMP1                 | 16.70               | 0.563(0.456-0.669)  | 53.1   | 61.5   | 51.0   |
|                                      | CTBS                 | 17.31               | 0.591(0.484-0.699)  | 60.0   | 57.7   | 60.6   |
|                                      | VASP                 | 12.21               | 0.572(0.470-0.675)  | 50.0   | 69.2   | 45.2   |
|                                      | CAB39                | 6.63                | 0.644 (0.539-0.75)  | 73.1   | 50.0   | 78.8   |

|                                       |                      |       |                    |      |      |      |
|---------------------------------------|----------------------|-------|--------------------|------|------|------|
|                                       | PPP3R1               | 9.46  | 0.625(0.520-0.730) | 60.8 | 65.4 | 59.6 |
|                                       | 13-genes combination | /     | 0.683(0.580-0.786) | 70.0 | 65.4 | 71.2 |
|                                       |                      |       |                    |      |      |      |
| Individual gene in C <sub>PE-PW</sub> | ITIH5                | 12.39 | 0.673(0.574-0.772) | 63.9 | 73.1 | 61.5 |
|                                       | PXN                  | 14.45 | 0.611(0.503-0.718) | 67.7 | 50.0 | 72.1 |
|                                       | CAP1                 | 8.14  | 0.596(0.49-0.703)  | 58.5 | 61.5 | 57.7 |
|                                       | EFS                  | 10.64 | 0.625(0.518-0.732) | 65.4 | 57.7 | 67.3 |
|                                       | CCPG1                | 16.09 | 0.558(0.449-0.666) | 56.9 | 53.8 | 57.7 |
|                                       | PSG1                 | 11.12 | 0.639(0.535-0.744) | 63.1 | 65.4 | 62.5 |
|                                       | VASP                 | 12.21 | 0.572(0.470-0.675) | 50.0 | 30.8 | 54.8 |
|                                       | PPP3R1               | 9.46  | 0.625(0.520-0.730) | 60.8 | 65.4 | 59.6 |
|                                       | ABHD5                | 9.36  | 0.591(0.507-0.676) | 56.2 | 15.4 | 66.4 |
|                                       | RYBP                 | 8.32  | 0.615(0.508-0.723) | 66.2 | 53.9 | 69.2 |
|                                       | IRF2                 | 6.61  | 0.606(0.499-0.713) | 66.9 | 50.0 | 71.2 |
|                                       | TNS3                 | 15.16 | 0.611(0.503-0.718) | 63.1 | 57.7 | 64.4 |
|                                       | ZCCHC6               | 12.81 | 0.601(0.498-0.704) | 54.6 | 69.2 | 51.0 |
|                                       | 13-genes combination | /     | 0.702(0.599-0.805) | 75.4 | 61.5 | 78.9 |

†The optimal cut-off point of each gene was defined when the value of (sensitivity+specificity)/2 reached a maximum. AUC = area under the receive operating characteristic curve. 95% CI = 95% confidence interval. Acc = accuracy. Sen = sensitivity. Spe = specificity.

**Supplemental Table S13. The logistical regression equations of classifiers**

| Classifier         | Equation (Logit [p=pregnancies with MA/FGR/GDM/PE])                                                                                                                                                                                                                                               | Threshold |
|--------------------|---------------------------------------------------------------------------------------------------------------------------------------------------------------------------------------------------------------------------------------------------------------------------------------------------|-----------|
| C <sub>MA-A</sub>  | $C_{MA-A} = 2.180 + 0.605 \times SMC3 - 1.204 \times MASTL + 1.366 \times CREM - 1.295 \times C1QTNF12 - 0.471 \times MLXIP - 0.811 \times MAP3K9 - 1.284 \times IGSF6 - 1.347 \times APC2 - 0.504 \times GPM6A + 1.048 \times TMEM128 - 0.057 \times NIPBL - 1.652 \times TMEM184A$              | 0.277     |
| C <sub>MA-P</sub>  | $C_{MA-P} = - 2.007 + 1.269 \times VAV3 + 1.405 \times COL4A1 + 0.240 \times LEPROT - 1.221 \times PROCR - 0.893 \times CRIM1 - 0.926 \times C5orf15 - 1.198 \times CRH + 1.201 \times TMEM2 + 1.213 \times CTSL$                                                                                 | 0.220     |
| C <sub>MA-W</sub>  | $C_{MA-W} = - 2.556 - 1.003 \times HSPA6 + 1.136 \times SYF2 + 0.602 \times CCPG1 - 0.1503 \times PLEKHO2 + 0.887 \times TLE3 + 1.224 \times SUPT4H1 - 1.528 \times BID + 1.879 \times CAB39 - 0.208 \times PF4V1 + 0.402 \times PBX2 - 1.011 \times MGAM - 0.597 \times SDCBP$                   | 0.188     |
| C <sub>MA-PW</sub> | $C_{MA-PW} = - 4.382 + 0.958 \times IFIT1 + 1.035 \times VAV3 - 0.982 \times HSPA6 + 1.251 \times COL4A1 + 1.461 \times SUSD6 + 0.471 \times TLE3 - 0.845 \times ARRB2 + 1.266 \times MMP11 + 1.457 \times CAB39 - 1.064 \times CRIM1 - 1.379 \times C5orf15 + 1.175 \times TMEM2 + 1.168 \times$ | 0.250     |



|              | CTSL                                                                                                                                                                                                                                                                                            |       |
|--------------|-------------------------------------------------------------------------------------------------------------------------------------------------------------------------------------------------------------------------------------------------------------------------------------------------|-------|
| $C_{FGR-A}$  | $C_{FGR-A} = -1 - 0.797 \times HPS5 - 1.142 \times PTSS2 + 0.846 \times OR4P4 + 0.636 \times PNRC2 + 1.208 \times CD63 + 0.310 \times VPS35 - 1.903 \times VAV1 - 1.313 \times DNPEP - 1.370 \times TCF7 + 0.673 \times DPP6 + 0.574 \times LANCL2 - 1.288 \times GPAT4 + 1.238 \times FAM214B$ | 0.190 |
| $C_{FGR-P}$  | $C_{FGR-P} = 0.360 - 1.489 \times ADM - 0.704 \times HSD17B1 - 0.969 \times MMP11 - 0.345 \times FBLN1 - 1.229 \times SLC5A6 + 1.218 \times CRIM1 - 1.079 \times ACVR2B - 0.389 \times RYBP - 0.273 \times PRKAG2 - 0.961 \times BZW2 - 0.154 \times AZIN1 + 1.402 \times LAMC3$                | 0.190 |
| $C_{FGR-W}$  | $C_{FGR-W} = -2.393 - 0.538 \times MAP3K11 + 0.5826 \times PLXNC1 + 0.23 \times CAP1 + 0.619 \times NUMB + 0.849 \times MLH3 + 0.764 \times VMP1 - 1.209 \times ARPC2 + 0.949 \times PPP3R1 + 0.480 \times ARAP3 - 1.138 \times LST1$                                                           | 0.222 |
| $C_{FGR-PW}$ | $C_{FGR-PW} = -1.867 - 1.154 \times ADM + 0.441 \times CAP1 + 0.700 \times NUMB + 1.166 \times MLH3 + 0.852 \times SERPINB - 1.105 \times ACVR2B - 0.211 \times PRKAG2 + 0.545 \times PILRA - 1.030 \times FAM49B$                                                                              | 0.208 |
| $C_{GDM-A}$  | $C_{GDM-A} = 0.957 + 0.565 \times CC2D2B - 1.060 \times NAT10 - 1.070 \times SIPA1 - 0.620 \times ZNF565 - 0.805 \times ZNF552 - 0.367 \times WDR35 + 0.559 \times MICALL1 - 0.653 \times CTNNB1 - 0.529 \times CLOCK - 0.674 \times BCKDHB - 0.693 \times TGIF2LY$                             | 0.259 |
| $C_{GDM-P}$  | $C_{GDM-P} = -0.886 + 0.699 \times RBMS2 - 0.529 \times IFI6 - 0.867 \times HSD17B2 - 0.496 \times DLX4 - 0.701 \times CSHL1 - 0.676 \times LGALS14 + 0.469 \times EPS8L1 + 0.439 \times PROCR + 0.587 \times DAG1 - 0.350 \times SQSTM1 - 0.179 \times AZIN1 + 0.812 \times CTSL$              | 0.251 |
| $C_{GDM-W}$  | $C_{GDM-W} = -1.82265 - 0.073 \times CREBBP + 0.595 \times SUPT4H1 + 0.728 \times CTBS - 0.202 \times ARPC2 + 0.145 \times ASXL2 - 0.403 \times PF4 + 0.544 \times HIST1H2BC + 0.398 \times SDCBP - 0.626 \times TOPORS$                                                                        | 0.261 |
| $C_{GDM-PW}$ | $C_{GDM-PW} = -0.217 - 0.456 \times FRAT1 - 0.489 \times IFI6 + 0.159 \times HSD11B2 - 0.713 \times HSD17B2 - 0.617 \times DLX4 - 0.568 \times CSHL1 - 0.563 \times LGALS14 - 0.115 \times ARPC2 + 0.662 \times HIST1H2BC + 0.407 \times TMEM2 + 0.469 \times VGLL1$                            | 0.263 |
| $C_{PE-A}$   | $C_{PE-A} = -0.655 - 1.146 \times NFKB2 + 1.350 \times EHP1L1 - 1.371 \times AMOTL1 - 0.784 \times VSIG10 - 1.047 \times USP10 - 1.226 \times ZSWIM4 + 1.242 \times ZNF565 - 0.983 \times BZW1 + 0.761 \times ATP6V1E2 + 1.842 \times CDX1$                                                     | 0.258 |
| $C_{PE-P}$   | $C_{PE-P} = -1.745 + 1.500 \times ITIH5 - 0.524 \times ST3GAL4 - 0.301 \times EVA1B - 1.22 \times PSG1 + 1.056 \times PSG7 - 1.267 \times SDC1 - 1.45 \times AGTR1 - 1.065 \times RYBP + 0.445 \times AFF1 + 1.659 \times TNS3 - 0.163 \times GNE + 1.273 \times HMGB3$                         | 0.170 |
| $C_{PE-W}$   | $C_{PE-W} = -1.756 + 1.224 \times PXN - 0.480 \times CAP1 - 0.010 \times MLH3 + 0.140 \times CCPG1 + 0.786 \times CRLF3 - 0.605 \times VMP1 + 0.662 \times CTBS - 1.021 \times VASP - 1.228 \times CAB39 + 1.536 \times PPP3R1$                                                                 | 0.201 |
| $C_{PE-PW}$  | $C_{PE-PW} = -1.634 + 1.546 \times ITIH5 + 0.825 \times PXN - 0.656 \times CAP1 - 0.984 \times EFS + 0.358 \times CCPG1 - 1.066 \times PSG1 - 0.658 \times VASP + 1.379 \times PPP3R1 + 0.531 \times ABHD5 - 0.461 \times RYBP - 0.973 \times IRF2 + 0.967 \times TNS3 - 0.440 \times ZCCHC6$   | 0.216 |

In these equations, the gene coverage around TSSs ranging from -1 KB to +1 KB were substituted with the discretized value “one” when the level of each gene was larger than the corresponding cut-off (see *Supplemental Table S8-S11*); otherwise, it was substituted with the discretized value “zero”. If the result of Logit p was larger than the corresponding threshold, the detected subject was predicted as pregnancy complications (MA, GFR, GDM, and PE); otherwise as non-obstetrical syndromes. MA = macrosomia. FGR = fetal growth restriction. GDM = gestational diabetes mellitus. PE = preeclampsia.

**Supplemental Table S14. The performance of the optimal classifiers based on promoter profiling of tissue-specific genes**

|                          | Whole blood-specific genes |      |      |      |                    | Placenta-specific genes |      |      |      |                     | Whole blood-and placenta-specific genes |      |      |      |
|--------------------------|----------------------------|------|------|------|--------------------|-------------------------|------|------|------|---------------------|-----------------------------------------|------|------|------|
|                          | AUC (95% CI)               | ACC  | Sen  | Spe  |                    | AUC (95% CI)            | ACC  | Sen  | Spe  |                     | AUC (95% CI)                            | ACC  | Sen  | Spe  |
| <b>Training cohort</b>   |                            |      |      |      |                    |                         |      |      |      |                     |                                         |      |      |      |
| C <sub>MA-W</sub>        | 0.718(0.628-0.808)         | 72.3 | 71.0 | 72.6 | C <sub>MA-P</sub>  | 0.746(0.657-0.835)      | 76.8 | 71.0 | 78.2 | C <sub>MA-PW</sub>  | 0.766 (0.678-0.854)                     | 80.0 | 71.0 | 82.3 |
| C <sub>FGR-W</sub>       | 0.670(0.588-0.751)         | 70.0 | 61.9 | 72.0 | C <sub>FGR-P</sub> | 0.711(0.633-0.790)      | 72.4 | 69.0 | 73.2 | C <sub>FGR-PW</sub> | 0.688(0.608-0.768)                      | 70.0 | 66.7 | 70.8 |
| C <sub>GDM-W</sub>       | 0.626(0.576-0.675)         | 64.5 | 58.7 | 66.4 | C <sub>GDM-P</sub> | 0.652(0.604-0.701)      | 66.5 | 62.7 | 67.7 | C <sub>GDM-PW</sub> | 0.647(0.598-0.696)                      | 67.3 | 59.5 | 69.8 |
| C <sub>PE-W</sub>        | 0.683(0.580-0.786)         | 70.0 | 65.4 | 71.2 | C <sub>PE-P</sub>  | 0.736(0.639-0.832)      | 73.8 | 73.1 | 74.0 | C <sub>PE-PW</sub>  | 0.702(0.599-0.805)                      | 75.4 | 61.5 | 78.8 |
| <b>Internal cohort</b>   |                            |      |      |      |                    |                         |      |      |      |                     |                                         |      |      |      |
| C <sub>MA-W</sub>        | 0.625(0.472-0.778)         | 63.1 | 61.5 | 63.5 | C <sub>MA-P</sub>  | 0.644(0.492-0.796)      | 66.2 | 61.5 | 67.3 | C <sub>MA-PW</sub>  | 0.635(0.482-0.787)                      | 64.6 | 61.5 | 65.4 |
| C <sub>FGR-W</sub>       | 0.586(0.447-0.725)         | 63.8 | 50.0 | 67.2 | C <sub>FGR-P</sub> | 0.570(0.431-0.710)      | 61.3 | 50.0 | 64.1 | C <sub>FGR-PW</sub> | 0.625(0.487-0.763)                      | 66.3 | 56.3 | 68.8 |
| C <sub>GDM-W</sub>       | 0.562(0.485-0.639)         | 59.3 | 50.0 | 62.3 | C <sub>GDM-P</sub> | 0.679(0.606-0.753)      | 70.4 | 63.0 | 72.8 | C <sub>GDM-PW</sub> | 0.633(0.557-0.708)                      | 65.3 | 59.3 | 67.3 |
| C <sub>PE-W</sub>        | 0.739(0.586-0.891)         | 74.5 | 72.7 | 75.0 | C <sub>PE-P</sub>  | 0.750(0.598-0.902)      | 76.4 | 72.7 | 77.3 | C <sub>PE-PW</sub>  | 0.750(0.598-0.902)                      | 76.4 | 72.7 | 77.3 |
| <b>External cohort-1</b> |                            |      |      |      |                    |                         |      |      |      |                     |                                         |      |      |      |
| C <sub>MA-W</sub>        | 0.619(0.537-0.702)         | 64.2 | 58.1 | 65.7 | C <sub>MA-P</sub>  | 0.663(0.582-0.744)      | 69.8 | 60.5 | 72.1 | C <sub>MA-PW</sub>  | 0.640(0.557-0.722)                      | 68.8 | 55.8 | 72.1 |
| C <sub>FGR-W</sub>       | 0.602(0.514-0.690)         | 66.3 | 50.0 | 70.4 | C <sub>FGR-P</sub> | 0.635(0.548-0.722)      | 71.6 | 50.0 | 77.0 | C <sub>FGR-PW</sub> | 0.625(0.537-0.713)                      | 66.8 | 55.3 | 69.7 |
| C <sub>GDM-W</sub>       | 0.610(0.535-0.685)         | 64.7 | 53.6 | 68.5 | C <sub>GDM-P</sub> | 0.554(0.478-0.629)      | 58.0 | 50.0 | 60.7 | C <sub>GDM-PW</sub> | 0.616(0.542-0.690)                      | 62.1 | 60.7 | 62.5 |
| C <sub>PE-W</sub>        | 0.674(0.562-0.785)         | 71.3 | 60.9 | 73.9 | C <sub>PE-P</sub>  | 0.625(0.512-0.738)      | 63.5 | 60.9 | 64.1 | C <sub>PE-PW</sub>  | 0.679(0.572-0.787)                      | 67.0 | 69.6 | 66.3 |
| <b>External cohort-2</b> |                            |      |      |      |                    |                         |      |      |      |                     |                                         |      |      |      |
| C <sub>MA-W</sub>        | 0.598(0.501-0.694)         | 65.6 | 50.0 | 69.5 | C <sub>MA-P</sub>  | 0.520(0.422-0.617)      | 55.0 | 46.9 | 57.0 | C <sub>MA-PW</sub>  | 0.555(0.457-0.652)                      | 60.6 | 46.9 | 64.1 |
| C <sub>FGR-W</sub>       | 0.559(0.465-0.653)         | 54.1 | 58.8 | 52.9 | C <sub>FGR-P</sub> | 0.500(0.416-0.584)      | 64.1 | 26.5 | 73.5 | C <sub>FGR-PW</sub> | 0.533(0.441-0.625)                      | 62.4 | 38.2 | 68.4 |
| C <sub>GDM-W</sub>       | 0.484(0.382-0.586)         | 51.6 | 41.9 | 54.8 | C <sub>GDM-P</sub> | 0.489(0.387-0.591)      | 52.4 | 41.9 | 55.9 | C <sub>GDM-PW</sub> | 0.5484(0.446-0.651)                     | 58.1 | 48.4 | 61.3 |
| C <sub>PE-W</sub>        | /                          | /    | /    | /    | C <sub>PE-P</sub>  | /                       | /    | /    | /    | C <sub>PE-PW</sub>  | /                                       | /    | /    | /    |
| <b>All subjects</b>      |                            |      |      |      |                    |                         |      |      |      |                     |                                         |      |      |      |
| C <sub>MA-W</sub>        | 0.640(0.591-0.689)         | 66.6 | 59.7 | 68.3 | C <sub>MA-P</sub>  | 0.644(0.595-0.693)      | 67.2 | 59.7 | 69.1 | C <sub>MA-PW</sub>  | 0.649 (0.600-0.698)                     | 69.1 | 58.0 | 71.8 |
| C <sub>FGR-W</sub>       | 0.611(0.563-0.658)         | 64.0 | 56.2 | 66.0 | C <sub>FGR-P</sub> | 0.616(0.569-0.664)      | 68.6 | 50.0 | 73.3 | C <sub>FGR-PW</sub> | 0.621 (0.574-0.668)                     | 66.7 | 54.6 | 69.6 |
| C <sub>GDM-W</sub>       | 0.593(0.559-0.627)         | 62.0 | 53.9 | 64.7 | C <sub>GDM-P</sub> | 0.618(0.584-0.652)      | 63.9 | 57.7 | 65.9 | C <sub>GDM-PW</sub> | 0.626 (0.592-0.660)                     | 64.7 | 58.4 | 66.8 |
| C <sub>PE-W</sub>        | 0.690(0.623-0.757)         | 71.3 | 65.0 | 72.9 | C <sub>PE-P</sub>  | 0.696(0.630-0.762)      | 70.3 | 68.3 | 70.8 | C <sub>PE-PW</sub>  | 0.702 (0.636-0.768)                     | 72.3 | 66.7 | 73.8 |

AUC = area under the receive operating characteristic curve. 95% CI = 95% confidence interval. Acc = accuracy. Sen = sensitivity. Spe = specificity.

**Supplemental Table S15. The AUC comparison between different classifier sets**

|              | AUC (95% CI)        | p-value  |
|--------------|---------------------|----------|
| MA           |                     |          |
| $C_{MA-A}$   | 0.779 (0.736-0.823) |          |
| $C_{MA-W}$   | 0.640 (0.591-0.689) | 2.97E-06 |
| $C_{MA-P}$   | 0.644 (0.595-0.693) | 5.78E-05 |
| $C_{GDM-PW}$ | 0.649 (0.600-0.698) | 8.88E-05 |
| FGR          |                     |          |
| $C_{FGR-A}$  | 0.773 (0.732-0.814) |          |
| $C_{FGR-W}$  | 0.611 (0.563-0.658) | 2.09E-06 |
| $C_{FGR-P}$  | 0.616 (0.569-0.664) | 8.62E-07 |
| $C_{FGR-PW}$ | 0.621 (0.574-0.668) | 9.24E-06 |
| GDM          |                     |          |
| $C_{GDM-A}$  | 0.718 (0.687-0.749) |          |
| $C_{GDM-W}$  | 0.593 (0.559-0.627) | 1.27E-07 |
| $C_{GDM-P}$  | 0.618 (0.584-0.652) | 4.86E-05 |
| $C_{GDM-PW}$ | 0.626 (0.592-0.660) | 1.31E-04 |
| PE           |                     |          |
| $C_{PE-A}$   | 0.825 (0.770-0.880) |          |
| $C_{PE-W}$   | 0.690 (0.623-0.757) | 4.68E-04 |
| $C_{PE-P}$   | 0.696 (0.630-0.762) | 3.37E-03 |
| $C_{PE-PW}$  | 0.702 (0.636-0.768) | 4.17E-03 |

P-values of AUC comparison were calculated using pROC package with default setting. 95% CI=95% confidence interval. MA = macrosomia. FGR = fetal growth restriction. GDM = gestational diabetes mellitus. PE = preeclampsia. P-value of AUC comparison between male- and female-bearing pregnancies was calculated using pROC package of R.

**Supplemental Table S16. The performance of clinical features for predicting pregnancy complications**

|     |                    | AUC (95% CI)        | Acc (%) | Sen (%) | Spe (%) | <i>P-value</i> |
|-----|--------------------|---------------------|---------|---------|---------|----------------|
| MA  | C <sub>MA-A</sub>  | 0.779 (0.736-0.823) | 80.3    | 73.9    | 81.9    |                |
|     | BMI                | 0.714 (0.668-0.761) | 73.9    | 67.2    | 75.6    | 0.045          |
|     | Combination        | 0.762 (0.721-0.803) | 73.4    | 80.7    | 71.6    | 0.32           |
| FGR | C <sub>FGR-A</sub> | 0.773 (0.732-0.814) | 78.9    | 74.6    | 80.0    |                |
|     | BMI                | 0.690 (0.645-0.736) | 74.9    | 59.2    | 78.8    | 9.32E-03       |
|     | Combination        | 0.786 (0.744-0.827) | 81.8    | 73.1    | 84.0    | 0.311          |
| GDM | C <sub>GDM-A</sub> | 0.718 (0.687-0.749) | 72.1    | 71.2    | 72.4    |                |
|     | BMI                | 0.540 (0.506-0.574) | 58.7    | 44.6    | 63.4    | 9.66E-14       |
|     | Combination        | 0.682 (0.650-0.715) | 68.1    | 68.5    | 67.9    | 2.20E-03       |
| PE  | C <sub>PE-A</sub>  | 0.825 (0.770-0.880) | 83.0    | 81.7    | 83.3    |                |
|     | BMI                | 0.667 (0.598-0.735) | 68.7    | 63.3    | 70.0    | 1.93E-04       |
|     | Combination        | 0.629 (0.560-0.699) | 65.6    | 67.5    | 58.4    | 1              |

MA = macrosomia. FGR = fetal growth restriction. GDM = gestational diabetes mellitus. PE = preeclampsia. AUC = area under the receive operating characteristic curve. 95% CI = 95% confidence interval. Acc = accuracy. Sen = sensitivity. Spe = specificity. Combination meant that the BMI was taken as one of the features of set-A classifier of each pregnancy complication to develop novel classifier. *P-value* of AUC comparison was calculated by the pROC package of R. BMI means body mass index before pregnancy.

**Supplemental Table S17. Functional annotation of genes in classifiers by retrieving literatures**

| Classifier        | Gene     | Function annotation                                                                                                 | PMID     |
|-------------------|----------|---------------------------------------------------------------------------------------------------------------------|----------|
| C <sub>MA-A</sub> | SMC3     | Central component of cohesin, a complex required for chromosome cohesion during the cell cycle.                     | 18614053 |
|                   | MASTL    | Serine/threonine kinase that plays a key role in M phase by acting as a regulator of mitosis entry and maintenance. | 20818157 |
|                   | CIQTNF12 | Insulin-sensitizing adipocyte-secreted protein that regulates glucose metabolism in liver and adipose tissue.       | 21849507 |

|                    |         |                                                                                                                                                     |          |
|--------------------|---------|-----------------------------------------------------------------------------------------------------------------------------------------------------|----------|
|                    | MLXIP   | It is involved in the regulation of genes in response to cellular glucose levels.                                                                   | 19706488 |
|                    | MAP3K9  | It plays a role in mitochondrial death signaling pathway, including the release cytochrome c, leading to apoptosis.                                 | 26573018 |
|                    | APC2    | This gene has its highest expression in the central nervous system and is involved in brain development through cytoskeletal regulation in neurons. | 17367777 |
|                    | NIPBL   | It plays a role in developmental regulation.                                                                                                        | 15373324 |
|                    | CREM    | It is associated with Type 1 Diabetes Mellitus                                                                                                      | 17509149 |
| $C_{\text{FGR-A}}$ | CD63    | Different levels of platelet activation in preeclamptic, normotensive pregnant, and non-pregnant women.                                             | 15118653 |
|                    | TCF7    | This gene is associated with type 1 diabetes.                                                                                                       | 12765974 |
|                    | DNPEP   | It likely to play an important role in intracellular protein and peptide metabolism.                                                                | 28514442 |
|                    | PTDSS2  | The protein functions in cell signaling, blood coagulation, and apoptosis.                                                                          | 14984733 |
|                    | VAV1    | It couples tyrosine kinase signals with the activation of the Rho/Rac GTPases, thus leading to cell differentiation and/or proliferation.           | 21647562 |
|                    | PNRC2   | It plays roles in glucocorticoid receptor-mediated mRNA degradation by interacting with the glucocorticoid receptor NR3C1.                          | 25775514 |
| $C_{\text{GDM-A}}$ | NAT10   | It may affect microtubule stability and cell division.                                                                                              | 19303003 |
|                    | SIPA1   | It affects cell cycle progression.                                                                                                                  | 19765277 |
|                    | WDR35   | It promotes TNF-stimulated apoptosis.                                                                                                               | 20193664 |
|                    | MICALL1 | It may indirectly play a role in neurite outgrowth.                                                                                                 | 25086062 |
|                    | CTNNB1  | It regulates cell growth and adhesion between cells                                                                                                 | 28456466 |
|                    | CLOCK   | Polymorphisms in this gene may be associated with obesity and metabolic syndrome.                                                                   | 18541547 |
|                    | BCKDHB  | Mutations in this gene have been associated with maple syrup urine disease (MSUD), type 1B.                                                         | 22326532 |
| $C_{\text{PE-A}}$  | NFKB2   | It involves in inflammation and immune function, which is associated with preterm birth.                                                            | 18818748 |
|                    | AMOTL1  | It induces the remodeling of the actin cytoskeleton.                                                                                                | 19565639 |
|                    | CDX1    | It could play a role in the terminal differentiation of the intestine.                                                                              | 19059241 |

PMID = PubMed Unique Identifier.

**Supplemental Table S18. Performance evaluation of the classifiers**

| Classifier        | Positive predictive value | Negative predictive value |
|-------------------|---------------------------|---------------------------|
| $C_{\text{MA-A}}$ | 0.483                     | 0.927                     |

|                    |       |       |
|--------------------|-------|-------|
| $C_{\text{GFR-A}}$ | 0.506 | 0.926 |
| $C_{\text{GDM-A}}$ | 0.462 | 0.883 |
| $C_{\text{PE-A}}$  | 0.551 | 0.948 |
